# Supplementary material for: Factors Associated With Gestational Diabetes Mellitus in Rural Areas of Limpopo Province: A Descriptive Analysis
Source: Research Square preprint supplement (doi:10.21203/rs.3.rs-110121/v1), 2020-12-07
Supplement: Supplementary file 1 [file ac9d7ab678dacdac39be58d6.docx]

# QUESTIONNAIRE – ENGLISH VERSION

**Elelwani Thelma Ntshauba¹˒², Eric Maimela¹* and Thembelihle Samuel Ntuli¹**

**¹Faculty of Health Sciences, Department of Public Health, University of Limpopo, South Africa**

**²Department of Health, Nkhensani Hospital, Greater Giyani Area, Mopani District, Limpopo province**

***Corresponding author:** [**eric.maimela@ul.ac.za**](mailto:eric.maimela@ul.ac.za)

The aim of the study is to investigate the prevalence, risk factors, maternal and infant outcomes of women with gestational diabetes mellitus in the Greater Giyani Area, Mopani District, Limpopo Province. The study is being conducted through the University of Limpopo. There are 20 questions in this questionnaire. The questionnaire might take you 15 – 20 minutes to complete. For questions with alternative options, indicate by crossing (x) in the box. For questions with blank spaces, please provide an answer in writing.

| **Q1** | What is your age: |  | | | | |
| --- | --- | --- | --- | --- | --- | --- |
| **Q2** | What is your home language? | Tshivenda | | |  | |
|  |  | Sepedi | | |  | |
|  |  | Sesotho | | |  | |
| **Q3** | What is your marital status? | Single | | |  | |
|  |  | Married | | |  | |
| **Q4** | What is your ethnic origin/race? | Black | | |  | |
|  |  | Indian | | |  | |
| **Q5** | How many people live with you |  | | | | |
| **Q6** | What is your level of education? | None | | |  | |
|  |  | Primary | | |  | |
|  |  | Secondary | | |  | |
|  |  | Tertiary | | |  | |
| **Q7** | Are you working? |  | | |  | |
| **Q8** | If not employed, what is your source of income? |  | | | | |
| **Q9** | Where do you live? |  | | | | |
| **Q10** | When did you start attending antenatal clinic visits? | ≤4 Weeks |  | | 5-6 Weeks |  |
|  |  | 7-8 Weeks |  | | >8 Weeks |  |
| **Q11** | Which medical condition were you diagnosed with during this pregnancy? (specify date) |  | | | | |
| **Q12** | Have you been pregnant before? | Yes | | | No | |
| **Q13** | Were you diagnosed with gestational diabetes mellitus in your previous pregnancy? | Yes | | | No | |
| **Q14** | Is there anyone in your family i.e. Parents, siblings, close relatives who have diabetes? | Yes | | | No | |
| **Q15** | Have you experienced past pregnancy complications before? | Yes | | | No | |
| **Q16** | If yes, what were they? |  | | | | |
| **Q17** | What is your | Weight | |  | | |
|  |  | Height | |  | | |
| **Q18** | What treatment are you receiving for your medical condition? |  | | | | |

***Thank you for your participation***

# DATA ENTRY FORM FOR COLLATETAL INFORMATION FROM PARTICIPANT MEDICAL FILE

Participant’s medical records will be reviewed and the following data will be extracted from the file using the data entry form outlined below:

| ID | Age | Gestational age | Weight (kg) | Height (m) | Past obstetric history | Test/s conducted to diagnose Medical condition in pregnancy | Test result | Complications | Treatment received |
| --- | --- | --- | --- | --- | --- | --- | --- | --- | --- |
|  |  |  |  |  |  |  |  |  |  |
|  |  |  |  |  |  |  |  |  |  |
|  |  |  |  |  |  |  |  |  |  |
|  |  |  |  |  |  |  |  |  |  |
|  |  |  |  |  |  |  |  |  |  |
|  |  |  |  |  |  |  |  |  |  |
